# Supplementary material for: Host Responses and Regulation by NFκB Signaling in the Liver and Liver Epithelial Cells Infected with A Novel Tick-borne Bunyavirus
Source: PubMed Central journal article supplement (PMC4488873; doi:10.1038/srep11816), 2015-07-02

**Supplemental Materials: SREP-15-01164A**

**Host Responses and Regulation by NF $\kappa$ B Signaling in the Liver and Liver Epithelial Cells Infected with the Novel Tick-borne Bunyavirus**

Qiyu Sun<sup>1</sup>, Cong Jin<sup>2</sup>, Lili Zhu<sup>1</sup>, Mifang Liang<sup>2</sup>, Chuan Li<sup>2</sup>, Carol J. Cardona<sup>3</sup>, Dexin Li<sup>2\*</sup>, and Zheng Xing<sup>1,3\*</sup>

- 1 The Key Laboratory of Pharmaceutical Biotechnology and Medical School, Nanjing University, Nanjing, China.
- 2 National Institute for Viral Disease Control and Prevention, Chinese Center for Disease Control and Prevention, Beijing, China.
- 3 Veterinary and Biomedical Sciences, College of Veterinary Medicine, University of Minnesota, Twin Cities, Saint Paul, MN, USA.

\* Corresponding authors:

Zheng Xing, Mailing address: 300D Veterinary Science Building, University of Minnesota at Twin Cities, 1971 Commonwealth Avenue, Saint Paul, MN 55108.

E-mail: [zxing@umn.edu](mailto:zxing@umn.edu) Tel: (612) 626-5392 Fax: (612) 626-5203

or Dexin Li, Mailing address: National Institute for Viral Disease Control and Prevention, Chinese Center for Disease Control and Prevention, Beijing, China.

E-mail: [lidx@chinacdc.cn](mailto:lidx@chinacdc.cn)

**Supplemental Figure F1.** Induction of proinflammatory cytokines and chemokines in SFTSV-infected MHCC-LM3 cells. Total RNA was prepared from uninfected or infected cells at indicated time points and used for reverse transcription and real-time PCR analyses with specific primers to cytokine genes or the S gene. Reactions were conducted in duplicates and each reaction was repeated at least three times; a representative result is presented. Fold changes were calculated relative to a gene in uninfected and infected cells, which were internally normalized to GAPDH. Fold changes in mRNA levels for IL-1 $\beta$ (A), IL-6(B), IL-8 (C) and MIP-3 $\alpha$  (D); and RANTES(E), IP-10(F), TNF- $\alpha$  (G) and S gene (H).

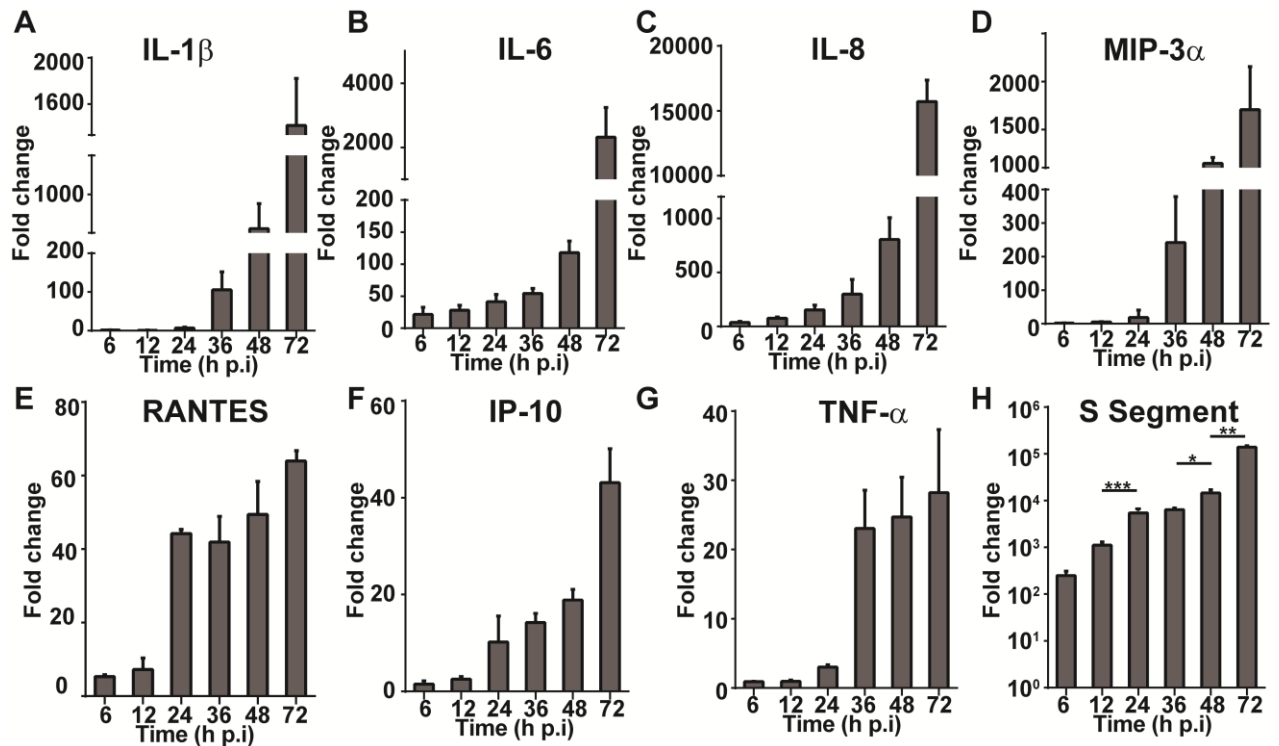

Supplement: srep11816-s1.pdf [file srep11816-s1.pdf]
